# Supplementary material for: A charge density study of π-delocalization and intermolecular interactions
Source: Royal Society of Chemistry journal article supplement (doi:10.1039/c5cp01575h), 2015-01-01
Supplement: c5cp01575h1.pdf [file c5cp01575h1.pdf]

## Supporting information

### Charge Density Study of the $\pi$ -Delocalization and Intermolecular Interactions

*Lai-Chin Wu,<sup>a</sup> Wen-Chun Chung,<sup>a</sup> Chih-Chieh Wang,<sup>\*b</sup> Gene-Hsiang Lee,<sup>c</sup> Shih-I*

*Lu,<sup>b</sup> and Yu Wang<sup>\*a</sup>*

<sup>a</sup> Department of Chemistry, National Taiwan University, Taipei, Taiwan.

<sup>b</sup> Department of Chemistry, Soochow University, Taipei, Taiwan.

<sup>c</sup> Instrumentation Center, National Taiwan University, Taipei, Taiwan.

E-mail: wangyu@ntu.edu.tw; ccwang@scu.edu.tw

**KEYWORDS**  $\pi$ - $\pi$  stacking, deformation density; topological analysis; hydrogen  
bond; Fermi-hole distribution, Hirshfeld surface

## Supplementary Materials

Figure S1. Twelve  $p_\pi$ -molecular orbitals of **atrz**

Table S1. Crystal data and structure refinement for **atrz**.

Table S2. Agreement Indices of Various LS-Refinements for **atrz**.

Table S3 Thermal parameters ( $U_{ij}$ ) and multipole populations ( $P_{lm}$ ) of **atrz**.

Table S4.  $\pi$ - $\pi$  interactions of **atrz** in crystal.

Table S 5. H-bonds of **atrz**.

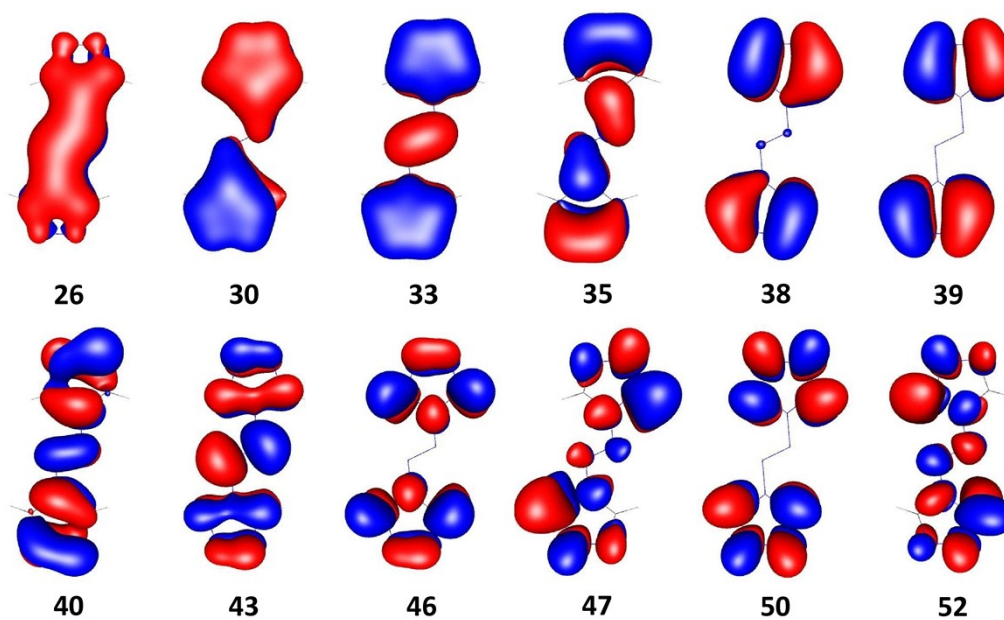

Figure S1. Twelve  $p_\pi$ -molecular orbitals of **atrz**

Table S1. Crystal data and structure refinement for **atrz**.

|                                   |                                                                          |
|-----------------------------------|--------------------------------------------------------------------------|
| Empirical formula                 | C <sub>4</sub> H <sub>4</sub> N <sub>8</sub>                             |
| Formula weight                    | 164.15                                                                   |
| Temperature                       | 100(2) K                                                                 |
| Wavelength                        | 0.71073 Å                                                                |
| Crystal system                    | Monoclinic                                                               |
| Space group                       | P2(1)/n                                                                  |
| Unit cell dimensions              | a = 4.9579(10) Å<br>b = 6.4613(13) Å<br>c = 10.181(2) Å<br>β = 92.28(3)° |
| Volume                            | 325.87(11) Å <sup>3</sup>                                                |
| Z                                 | 2                                                                        |
| Density (calculated)              | 1.673 Mg/m <sup>3</sup>                                                  |
| Absorption coefficient            | 0.126 mm <sup>-1</sup>                                                   |
| F(000)                            | 168                                                                      |
| Crystal size                      | 0.24 x 0.20 x 0.20 mm <sup>3</sup>                                       |
| Theta range for data collection   | 3.74 to 58.52°                                                           |
| Index ranges                      | -11 ≤ h ≤ 11, -15 ≤ k ≤ 15, -24 ≤ l ≤ 24                                 |
| Reflections collected             | 60794                                                                    |
| Independent reflections           | 4718 [R(int) = 0.0315]                                                   |
| Completeness to theta = 58.52°    | 100.0 %                                                                  |
| Max. and min. transmission        | 0.9752 and 0.9704                                                        |
| Refinement method                 | Full-matrix least-squares on F <sup>2</sup>                              |
| Data / restraints / parameters    | 4181 / 0 / 63                                                            |
| Goodness-of-fit on F <sup>2</sup> | 1.083                                                                    |
| Final R indices [I > 2σ(I)]       | R1 = 0.0283, wR2 = 0.0891                                                |
| R indices (all data)              | R1 = 0.0333, wR2 = 0.0941                                                |
| Largest diff. peak and hole       | 0.677 and -0.317 e.Å <sup>-3</sup>                                       |

$${}^a R_{\text{int}} = \frac{\sum |F_o^2 - F_o^2(\text{mean})|}{\sum |F_o^2|}; \quad R_1 = \frac{\sum |F_o - F_c|}{\sum |F_o|}; \quad wR_2 = \left\{ \frac{\sum |w(F_o^2 - F_c^2)|}{\sum |w(F_o^2)|} \right\}^{1/2};$$

$${}^c \text{GOF} = \left[ \frac{\sum w |F_o - F_c|^2}{(N_{\text{ref}} - N_{\text{v}})} \right]^{1/2};$$

Table S2. Agreement Indices of Various LS-Refinements for **atrz**.

| $N_{ref}$ <sup>[a]</sup> : 4086 | $N_v$ <sup>[b]</sup> | $N_{ref}/N_v$ | $R_I$ <sup>[c]</sup> | $R_{Iw}$ <sup>[d]</sup> | $R_2$ <sup>[e]</sup> | $R_{2w}$ <sup>[f]</sup> | $GOF$ <sup>[g]</sup> |
|---------------------------------|----------------------|---------------|----------------------|-------------------------|----------------------|-------------------------|----------------------|
| Conventional                    | 54                   | 75.67         | 0.031                | 0.044                   | 0.057                | 0.088                   | 5.318                |
| Monopole                        | 64                   | 64.86         | 0.032                | 0.047                   | 0.063                | 0.093                   | 5.637                |
| Dipole                          | 88                   | 46.97         | 0.029                | 0.042                   | 0.060                | 0.083                   | 5.083                |
| Quadrupole                      | 118                  | 34.92         | 0.025                | 0.036                   | 0.054                | 0.072                   | 4.422                |
| Octupole                        | 180                  | 25.70         | 0.016                | 0.016                   | 0.030                | 0.033                   | 2.001                |

[a]  $N_{ref}$ : number of reflections. [b]  $N_v$ : number of variables. [c]  $R_I = [\sum |F_o - F_c| / \sum |F_o|]^{1/2}$ .  
[d]  $R_I = \sum |F_o - F_c| / \sum |F_o|$ ;  $R_{Iw} = (\sum w |F_o - F_c|^2 / \sum w F_o^2)^{1/2}$ ;  $R_2 = [\sum |F_o^2 - F_c^2| / \sum (F_o^2)]$ ;  
 $R_{2w} = \{\sum w (F_o^2 - F_c^2)^2 / \sum w (F_o^2)^2\}^{1/2}$ ;  $GOF = [\sum w |F_o - F_c|^2 / (N_{ref} - N_v)]^{1/2}$ ,  $w = 1 / [\sigma(F_o^2)]$

Table S3 Atomic Thermal parameters ( $U_{ij}$ ) and multipole populations ( $P_{lm}$ ) of **atrz**.

|      |          |          |          |          |           |          |           |         |         |         |         |
|------|----------|----------|----------|----------|-----------|----------|-----------|---------|---------|---------|---------|
| N(1) | $U_{ij}$ | 0.012025 | 0.010482 | 0.014981 | -0.003082 | 0.001462 | -0.002119 |         |         |         |         |
|      | $P_{lm}$ | 4.9678   | 0.0000   | 0.0197   | -0.0515   | -0.0273  | 0.0669    | -0.0067 | 0.0969  | -0.0651 | -0.0163 |
|      |          | 0.1170   | -0.0015  | -0.0304  | 0.0470    | 0.0018   | -0.0003   | -0.0462 | 0.0000  | 0.0000  | 0.0000  |
|      |          | 0.0000   | 0.0000   | 0.0000   | 0.0000    | 0.0000   | 0.0000    |         |         |         |         |
| N(2) | $U_{ij}$ | 0.013111 | 0.010509 | 0.013515 | -0.001007 | 0.001523 | -0.003244 |         |         |         |         |
|      | $P_{lm}$ | 4.9990   | 0.0000   | -0.0061  | -0.0648   | -0.0290  | 0.0622    | 0.0055  | 0.0908  | -0.0598 | -0.0073 |
|      |          | 0.0988   | 0.0059   | -0.0269  | 0.0668    | -0.0030  | -0.0013   | -0.0470 | 0.0000  | 0.0000  | 0.0000  |
|      |          | 0.0000   | 0.0000   | 0.0000   | 0.0000    | 0.0000   | 0.0000    |         |         |         |         |
| N(3) | $U_{ij}$ | 0.009537 | 0.008225 | 0.009763 | -0.001171 | 0.001078 | -0.000816 |         |         |         |         |
|      | $P_{lm}$ | 5.0386   | 0.0000   | 0.0214   | -0.0003   | -0.0177  | 0.0119    | -0.0055 | 0.0005  | 0.0042  | 0.0213  |
|      |          | 0.1553   | -0.0107  | 0.0785   | 0.1201    | 0.0052   | -0.0011   | 0.0064  | 0.0000  | 0.0000  | 0.0000  |
|      |          | 0.0000   | 0.0000   | 0.0000   | 0.0000    | 0.0000   | 0.0000    |         |         |         |         |
| N(4) | $U_{ij}$ | 0.010567 | 0.008828 | 0.010642 | -0.001645 | 0.001835 | -0.001220 |         |         |         |         |
|      | $P_{lm}$ | 4.9735   | 0.0000   | -0.0099  | 0.0477    | -0.0541  | -0.0281   | -0.0120 | -0.0328 | -0.1395 | 0.0005  |
|      |          | 0.1356   | -0.0066  | 0.0279   | 0.0473    | -0.0018  | -0.0198   | 0.0262  | 0.0000  | 0.0000  | 0.0000  |
|      |          | 0.0000   | 0.0000   | 0.0000   | 0.0000    | 0.0000   | 0.0000    |         |         |         |         |
| C(1) | $U_{ij}$ | 0.010302 | 0.010450 | 0.012192 | -0.001931 | 0.002053 | -0.001202 |         |         |         |         |
|      | $P_{lm}$ | 4.4996   | 0.0000   | 0.0008   | 0.0500    | 0.0689   | 0.1549    | -0.0037 | -0.0493 | -0.1106 | -0.0095 |
|      |          | 0.2496   | 0.0013   | 0.0187   | 0.1893    | 0.0117   | -0.0062   | 0.0312  | 0.0000  | 0.0000  | 0.0000  |
|      |          | 0.0000   | 0.0000   | 0.0000   | 0.0000    | 0.0000   | 0.0000    |         |         |         |         |
| C(2) | $U_{ij}$ | 0.010967 | 0.010225 | 0.011015 | -0.000888 | 0.002071 | -0.001233 |         |         |         |         |
|      | $P_{lm}$ | 4.5099   | 0.0000   | -0.0036  | 0.0764    | 0.0525   | 0.1802    | 0.0030  | -0.0554 | -0.1121 | 0.0157  |
|      |          | 0.2661   | 0.0004   | 0.0117   | 0.1952    | 0.0000   | 0.0173    | 0.0360  | 0.0000  | 0.0000  | 0.0000  |
|      |          | 0.0000   | 0.0000   | 0.0000   | 0.0000    | 0.0000   | 0.0000    |         |         |         |         |
| H(1) | $U_{ij}$ | 0.013112 | 0.000000 | 0.000000 | 0.000000  | 0.000000 | 0.000000  |         |         |         |         |
|      | $P_{lm}$ | 0.5071   | 0.0000   | 0.0199   | 0.0007    | -0.1027  | 0.0000    | 0.0000  | 0.0000  | 0.0000  | 0.0000  |
|      |          | 0.0000   | 0.0000   | 0.0000   | 0.0000    | 0.0000   | 0.0000    | 0.0000  | 0.0000  | 0.0000  | 0.0000  |
|      |          | 0.0000   | 0.0000   | 0.0000   | 0.0000    | 0.0000   | 0.0000    |         |         |         |         |
| H(2) | $U_{ij}$ | 0.012820 | 0.000000 | 0.000000 | 0.000000  | 0.000000 | 0.000000  |         |         |         |         |
|      | $P_{lm}$ | 0.5046   | 0.0000   | -0.0048  | -0.0373   | -0.0906  | 0.0000    | 0.0000  | 0.0000  | 0.0000  | 0.0000  |
|      |          | 0.0000   | 0.0000   | 0.0000   | 0.0000    | 0.0000   | 0.0000    | 0.0000  | 0.0000  | 0.0000  | 0.0000  |
|      |          | 0.0000   | 0.0000   | 0.0000   | 0.0000    | 0.0000   | 0.0000    |         |         |         |         |

Table S4.  $\pi$ - $\pi$  interactions of **atrz** in crystal.<sup>[a]</sup>

| Ring(i)<br>Ring(j)       | → Slip<br>(i,j)/° | angle <sup>[b]</sup> | Interplanar<br>(i,j)<br>distance <sup>[c]</sup> /Å | Horizontal<br>shift between<br>the (i,j) ring<br>centroids <sup>[d]</sup> /Å | Distance<br>between the<br>(i,j) ring<br>centroids/Å |
|--------------------------|-------------------|----------------------|----------------------------------------------------|------------------------------------------------------------------------------|------------------------------------------------------|
| R(1) → R(1) <sub>i</sub> |                   | 17.8                 | 3.17                                               | 1.02                                                                         | 3.33                                                 |

[a] Symmetry code:  $i = -x, 1-y, -z$ , Ring(i)/Ring(j) denotes the centroids of  $i$ -th/ $j$ -th of triazole/triazole rings; R(1) = N(1)–N(2)–C(2)–N(3)–C(1). [b] Slip angle: the angle formed between the ring-centroid vector (CC) and the ring normal to one of the triazole planers. [c] Interplanar distance: the perpendicular distance between two parallel triazole rings. [d] Horizontal shift between the ring centroids: a shift from the face-to-face alignment.

Table S 5. H-bonds of **atrz**.<sup>[a]</sup>

| D–H...A                  | H...A (Å) | D...A (Å) | ∠ D–H...A (°) |
|--------------------------|-----------|-----------|---------------|
| C1–H1...N1 <sub>i</sub>  | 2.45      | 3.252(4)  | 130           |
| C2–H2...N2 <sub>ii</sub> | 2.39      | 3.343(2)  | 146           |

[a] Symmetry operations:  $i = 1-x, 1-y, -z$ ;  $ii = -0.5-x, -0.5+y, 0.5-z$ .
